# Supplementary material for: Cytogenetically Cryptic Acute Promyelocytic Leukemia: A Diagnostic Challenge
Source: MDPI journal article supplement (doi:10.3390/ijms241713075), 2023-08-22
Supplement: s1 [file s1]

**Supplementary Table S1: 55 cases of cryptic APL cases in the literature.**

| PT# | Age | G | WBC<br>( $\times 10^9/L$ ) | HGB<br>(g/dL) | PLT<br>( $\times 10^9/L$ ) | PB<br>blasts<br>(%) | BM<br>blasts<br>(%) | FISH<br>Probe                                    | FISH<br>results | PCR | PCR<br>break<br>point | Karyotype                                                                                                                                                                            | NGS  | Other<br>methods | Treatment | Outcome  | PMID    | Year |
|-----|-----|---|----------------------------|---------------|----------------------------|---------------------|---------------------|--------------------------------------------------|-----------------|-----|-----------------------|--------------------------------------------------------------------------------------------------------------------------------------------------------------------------------------|------|------------------|-----------|----------|---------|------|
| 1   | 39  | F | 242.2                      | 8.8           | 20                         | 90%                 | NA                  | painting<br>probes,<br>fusion<br>probe           | N               | P   | bcr3                  | 46,XX,t(9;22)(q34;q<br>11.2)                                                                                                                                                         | None | None             | IDA+Ara-C | Deceased | 7736444 | 1995 |
| 2   | NA  | F | NA                         | NA            | NA                         | NA                  | NA                  | ICRF PML<br>and RAR $\alpha$<br>cosmid<br>probes | P               | P   | bcr3                  | 47,XX,del(5)(q2?3q3<br>4),+i(8)(q10)<br>[3]/45,XX,del(5)(q2?<br>3q34),add(7)(q32),-2<br>1 [2]/<br>92,XXXX,del(5)(q2?<br>3q34) x2 [2]/<br>46,XX [2]                                   | None | None             | NA        | NA       | 9389704 | 1997 |
| 3   | NA  | M | NA                         | NA            | NA                         | NA                  | NA                  | ICRF PML<br>and RAR $\alpha$<br>cosmid<br>probes | P               | P   | bcr1                  | 46,XY                                                                                                                                                                                | None | None             | NA        | NA       | 9389704 | 1997 |
| 4   | NA  | M | NA                         | NA            | NA                         | NA                  | NA                  | ICRF PML<br>and RAR $\alpha$<br>cosmid<br>probes | P               | P   | bcr3                  | 46,XY                                                                                                                                                                                | None | None             | NA        | NA       | 9389704 | 1997 |
| 5   | NA  | M | NA                         | NA            | NA                         | NA                  | NA                  | ICRF PML<br>and RAR $\alpha$<br>cosmid<br>probes | P               | P   | bcr1                  | 46,XY,t(4; 16)(p14;<br>q22),t(9; 12)(q22;<br>q24),ins(17;<br>15)(q21;q15q22)<br>[11]/<br>46,idem,t(6;<br>8)(q13;q22) [10]/<br>46,idem,add(3q),t(6;1<br>4),t(11;22) [3]<br>/46,XY [6] | None | None             | NA        | NA       | 9389704 | 1997 |
| 6   | NA  | F | NA                         | NA            | NA                         | NA                  | NA                  | ICRF PML<br>and RAR $\alpha$<br>cosmid<br>probes | P               | P   | bcr3                  | 46,XX,del(7)(q22q36<br>)[5]/<br>46,XX [5]                                                                                                                                            | None | None             | NA        | NA       | 9389704 | 1997 |
| 7   | NA  | F | NA                         | NA            | NA                         | NA                  | NA                  | ICRF PML<br>and RAR $\alpha$                     | P               | P   | bcr3                  | 46,XX                                                                                                                                                                                | None | None             | NA        | NA       | 9389704 | 1997 |

|    |    |   |      |     |    |     |     |                                    |                                            |   |      |                               |      |                |                |          |          |      |
|----|----|---|------|-----|----|-----|-----|------------------------------------|--------------------------------------------|---|------|-------------------------------|------|----------------|----------------|----------|----------|------|
|    |    |   |      |     |    |     |     | cosmid probes                      |                                            |   |      |                               |      |                |                |          |          |      |
| 8  | 25 | F | 2.9  | 8.3 | 9  | 70% | 95% | Biotin-labeled paint, fusion probe | N                                          | P | bcr1 | 46,XX,del(9)(q22)             | None | None           | ATRA+IDA+Aca-C | Deceased | 10484977 | 1999 |
| 9  | NA | M | NA   | NA  | NA | NA  | NA  | DCDF                               | insertion of small part of PML in the RARA | P | bcr3 | 47, XY, +8                    | None | Metaphase FISH | NA             | NA       | 12391544 | 2002 |
| 10 | NA | M | NA   | NA  | NA | NA  | NA  | DCDF                               | insertion of small part of RARA in the PML | P | bcr1 | 46,XY                         | None | Metaphase FISH | NA             | NA       | 12391544 | 2002 |
| 11 | NA | M | NA   | NA  | NA | NA  | NA  | DCDF                               | insertion of small part of RARA in the PML | P | bcr2 | 46,XY                         | None | Metaphase FISH | NA             | NA       | 12391544 | 2002 |
| 12 | 37 | F | 3.2  | 7.1 | 4  | NA  | NA  | DCDF                               | N                                          | P | bcr1 | 46,XX                         | None | None           | IDA+ATRA       | Alive    | 12505266 | 2002 |
| 13 | 48 | F | 14.9 | 8.8 | 36 | 86% | 84% | DCDF                               | N                                          | P | bcr3 | 47,XX,+8[14]/46,XX[2]         | None | None           | IDA+ATRA       | Alive    | 16797070 | 2007 |
| 14 | 10 | F | NA   | NA  | NA | NA  | NA  | DCDF                               | N                                          | P | bcr1 | 46,XX,i(17)(q10)[20]          | None | None           | IDA+ATRA       | Alive    | 17943164 | 2009 |
| 15 | 13 | F | NA   | NA  | NA | NA  | NA  | DCDF                               | N                                          | P | bcr1 | 46,XX,i(17)(q10)[18]/46,XX[2] | None | None           | IDA+ATRA       | Deceased | 17943164 | 2009 |
| 16 | 14 | M | NA   | NA  | NA | NA  | NA  | DCDF                               | N                                          | P | bcr3 | 46,XY                         | None | None           | IDA+ATRA       | Deceased | 17943164 | 2009 |
| 17 | 31 | F | NA   | NA  | NA | NA  | NA  | DCDF                               | N                                          | P | bcr1 | 46,XX                         | None | None           | IDA+ATRA       | Alive    | 17943164 | 2009 |

|    |    |   |      |      |     |     |         |      |                               |   |      |                                                                                                 |      |                      |                |                |          |      |
|----|----|---|------|------|-----|-----|---------|------|-------------------------------|---|------|-------------------------------------------------------------------------------------------------|------|----------------------|----------------|----------------|----------|------|
| 18 | 32 | F | NA   | NA   | NA  | NA  | NA      | DCDF | N                             | P | bcr3 | 46,XX                                                                                           | None | None                 | IDA+ATRA       | Alive          | 17943164 | 2009 |
| 19 | 41 | F | NA   | NA   | NA  | NA  | NA      | DCDF | N                             | P | bcr1 | 46,XX                                                                                           | None | None                 | IDA+ATRA       | Alive          | 17943164 | 2009 |
| 20 | 42 | F | NA   | NA   | NA  | NA  | NA      | DCDF | N                             | P | bcr1 | 46,XX,del(7)(q31q33),i(17)(q10)[14]/46,XX[6]                                                    | None | None                 | IDA/BHAC+ATRA  | Alive          | 17943164 | 2009 |
| 21 | 50 | F | NA   | NA   | NA  | NA  | NA      | DCDF | N                             | P | bcr3 | 46,XX                                                                                           | None | None                 | IDA+ATRA       | Alive          | 17943164 | 2009 |
| 22 | 51 | M | NA   | NA   | NA  | NA  | NA      | DCDF | N                             | P | bcr1 | 46,XY                                                                                           | None | None                 | IDA+ATRA       | Alive          | 17943164 | 2009 |
| 23 | 63 | F | NA   | NA   | NA  | NA  | NA      | DCDF | N                             | P | bcr3 | 46,XX                                                                                           | None | None                 | IDA+Ara-C      | Deceased       | 17943164 | 2009 |
| 24 | 63 | M | NA   | NA   | NA  | NA  | NA      | DCDF | N                             | P | bcr1 | 46,XY,add(15q26)                                                                                | None | None                 | IDA+ATRA       | Lost follow up | 17943164 | 2009 |
| 25 | 68 | M | NA   | NA   | NA  | NA  | NA      | DCDF | N                             | P | NA   | 46,XY,der(7)t(7;8)(q31;q22),der(17)ins(17;?)(q21;?)[15]/46,idem,del(9)(q12q22)[3]/47,idem,+8[2] | None | None                 | IDA+ATRA       | Alive          | 17943164 | 2009 |
| 26 | 44 | F | 1.5  | 12.6 | 49  | 5%  | 82%     | DCDF | N                             | P | bcr1 | 46,XX,i(17)(q10)[12]/46,XX[8]                                                                   | None | None                 | ATRA+IDA+Aca-C | Alive          | 18294238 | 2009 |
| 27 | 68 | F | 1.3  | 7.1  | 1.3 | 31% | NA      | DCDF | *Abnormal signal*             | P | bcr1 | 46,XX                                                                                           | None | Metaphase FISH       | ATRA           | NA             | 19036120 | 2009 |
| 28 | 39 | F | 16.9 | 7.6  | 174 | 94% | 95%     | DCDF | N                             | P | NA   | 46,XX,7q+[7]/46,XX[8]                                                                           | None | None                 | ATRA+ATO       | Alive          | 19162322 | 2009 |
| 29 | 26 | F | 0.6  | 7.7  | 155 | NA  | 86%     | BA   | N                             | P | bcr3 | 46,XX,del(5q)(q2?3q34),+i(8)(q10)[3]                                                            | None | None                 | IDA+ATRA       | Alive          | 19224461 | 2009 |
| 30 | 33 | F | 1.4  | 7.1  | 9.8 | NA  | 90%     | BA   | N                             | P | bcr3 | 46,XX                                                                                           | None | None                 | ATO            | Alive          | 19224461 | 2009 |
| 31 | 46 | M | 63.8 | 6.6  | 146 | NA  | 71%     | BA   | N                             | P | Bcr1 | 46,XY,del(19)(p13),del(12)(q24.1),del(5q)                                                       | None | None                 | IDA+ATRA       | Alive          | 19224461 | 2009 |
| 32 | 62 | F | 1.3  | 11.1 | 100 | NA  | 74.40 % | DCDF | fusion signal on chromosome 4 | P | NA   | 46,XX,add(4)(q21),add(5)(p13),add(15)(q22),add(18)(q21)[18]/46,XX[2]                            | None | Spectral karyotyping | ATRA           | Alive          | 19477514 | 2009 |

|    |    |   |       |      |    |     |     |                                 |                                                                 |   |                        |                                                  |      |                                               |                                                  |           |          |      |
|----|----|---|-------|------|----|-----|-----|---------------------------------|-----------------------------------------------------------------|---|------------------------|--------------------------------------------------|------|-----------------------------------------------|--------------------------------------------------|-----------|----------|------|
| 33 | 50 | F | 101.7 | 9.9  | 16 | NA  | NA  | DCDF                            | N                                                               | P | bcr3                   | 47,XX,+8[19]/46,XX[1]                            | None | None                                          | IDA+ATRA                                         | Alive     | 19893344 | 2009 |
| 34 | 46 | M | 1.7   | 10.6 | 18 | NA  | NA  | DCDF                            | N                                                               | P | bcr3                   | 92,XXYY[13]/46,XY[7]                             | None | None                                          | IDA+ATRA                                         | Alive     | 20417966 | 2010 |
| 35 | 52 | F | 2.5   | 8.4  | 65 | NA  | NA  | DCDF                            | N                                                               | P | bcr1                   | 47,XX,+i(5)(p10)[20]/48,idem,+9[2]/46,XX[6]      | None | Metaphase FISH                                | ATRA, cytosine arabinose and daunorubicin        | Alive     | 20863428 | 2010 |
| 36 | 18 | M | 16.5  | 9.5  | 37 | 84% | 94% | DCDF                            | N                                                               | P | 3 different size bands | 46,XY                                            | None | None                                          | ATRA                                             | Alive     | 21156244 | 2010 |
| 37 | 57 | M | 6.82  | 8.9  | 40 | 70% | 83% | Dual Color, Single Fusion Probe | N                                                               | P | bcr1                   | 46,XY                                            | None | None                                          | daunorubicin, cytarabine, and ATRA               | Alive     | 23370423 | 2013 |
| 38 | 24 | F | 4.5   | 10.5 | 71 | 55% | NA  | DCDF                            | P                                                               | P | bcr3                   | 46,XX,t(15;20;17)(q24;p13;q21)[13]/47,idem,+8[2] | None | aCGH and tCGH                                 | 7+3+5 (cytarabine, idarubicin, cladribine)+ ATRA | Alive     | 23370423 | 2013 |
| 39 | 17 | M | 9.9   | NA   | NA | 63  | 95% | DCDF                            | N                                                               | P | bcr1                   | 46,XY                                            | None | in-frame fusion of PML exon 6 and RARA exon 3 | ATRA+ATO +Chemotherapy                           | Alive, CR | 24561214 | 2014 |
| 40 | 61 | F | 2.7   | 11.1 | 15 | NA  | 90% | DCDF                            | 1F1O2 G in 52.5%; variant abnormal signal pattern with 1 fusion | P | bcr3                   | 46,XX                                            | None | None                                          | ATRA+idarubicin                                  | Alive     | 24673420 | 2014 |

|    |    |   |      |      |     |     |         |                                          |                                         |   |      |                  |                 |      |                                            |           |          |      |
|----|----|---|------|------|-----|-----|---------|------------------------------------------|-----------------------------------------|---|------|------------------|-----------------|------|--------------------------------------------|-----------|----------|------|
| 41 | 53 | F | 0.46 | 9.3  | 10  | NA  | 80%     | Dual fusion probes, two different probes | One negative; One with atypical signals | P | bcr1 | 46XX, i(17)(q11) | None            | None | “3 + 7”, ATRA+ATO                          | Alive     | 26471811 | 2015 |
| 42 | 12 | M | 79   | 6.1  | 21  | NA  | NA      | DCDF                                     | N                                       | P | bcr3 | 46,XY            | None            | None | ATRA+ATO +Daunorubicin                     | Deceased  | 31775484 | 2019 |
| 43 | 26 | F | 2.3  | 7.3  | 27  | NA  | NA      | DCDF                                     | N                                       | P | bcr1 | 46,XX            | None            | None | ATRA + Idabistat                           | Alive     | 31775484 | 2019 |
| 44 | 30 | M | 0.9  | 6.7  | 25  | NA  | NA      | DCDF                                     | N                                       | P | bcr1 | 46,XY            | None            | None | ATRA+ATO                                   | Alive     | 31775484 | 2019 |
| 45 | 33 | F | 40.6 | 6.8  | 20  | NA  | NA      | DCDF                                     | N                                       | P | bcr1 | 46,XX            | None            | None | ATRA+ATO +cytarabine+ idarubicin           | Alive     | 31775484 | 2019 |
| 46 | 37 | M | 8.8  | 11.2 | 21  | NA  | NA      | DCDF                                     | N                                       | P | bcr2 | 46,XY            | None            | None | ATRA+ATO +Daunorubicin                     | Alive     | 31775484 | 2019 |
| 47 | 45 | F | 33.3 | 3.7  | 11  | NA  | NA      | DCDF                                     | N                                       | P | bcr1 | 46,XX            | None            | None | ATRA+ATO                                   | Alive     | 31775484 | 2019 |
| 48 | 51 | F | 0.4  | 6.2  | 59  | NA  | NA      | DCDF                                     | N                                       | P | bcr1 | 46,XX            | None            | None | ATRA+ATO +Anthracyclines                   | Alive     | 31775484 | 2019 |
| 49 | 57 | F | NA   | 9.7  | 5.7 | 72% | 80%     | DCDF, BA                                 | N                                       | P | bcr1 | 46,XX            | None            | None | ATRA                                       | Alive     | 31809670 | 2020 |
| 50 | 66 | M | 2.95 | 7.8  | 7   | 68% | 51.50 % | DCDF                                     | N                                       | P | bcr1 | 46, XY           | CEBPA biallelic | None | IDA+Cytarabine+ATRA                        | NA        | 31959056 | 2020 |
| 51 | 12 | F | 22.5 | 7.4  | 16  | 70% | 70.40 % | DCDF                                     | N                                       | P | bcr3 | 46,XX            | FLT3 ITD        | None | AML-BFM 2012 protocol (SR group) plus ATRA | Alive     | 32909480 | 2020 |
| 52 | 68 | F | NA   | NA   | NA  | NA  | 70%     | BA                                       | **Abnormal                              | P | bcr3 | 46,XX            | None            | WGS  | ATRA+chemotherapy                          | Alive, CR | 32924730 | 2020 |

|    |    |   |     |      |    |    |     |                                                            |   |   |      |                             |      |      |                                                                                    |          |          |      |
|----|----|---|-----|------|----|----|-----|------------------------------------------------------------|---|---|------|-----------------------------|------|------|------------------------------------------------------------------------------------|----------|----------|------|
| 53 | 56 | F | 700 | 8    | 96 | NA | 74% | DCDF                                                       | N | P | bcr1 | 46,XX                       | None | None | ATRA,<br>switched to<br>Daunorubici<br>n and<br>Cytarabine,<br>switched to<br>ATRA | Deceased | 33851647 | 2021 |
| 54 | 23 | M | 1.5 | 10.7 | 26 | NA | NA  | Custom-<br>designed<br>Metasystem<br>s small loci<br>probe | P | P | bcr3 | 47, XY,<br>[7]/46,XY[13] +8 | None | None | ATRA+ATO                                                                           | Alive    | 34151721 | 2021 |
| 55 | 43 | F | 2.1 | 10.9 | 40 | NA | NA  | Custom-<br>designed<br>Metasystem<br>s small loci<br>probe | P | P | bcr3 | 47, XX, +8                  | None | None | ATRA+ATO                                                                           | Alive    | 34151721 | 2021 |

**Abbreviation:** BCR breakpoint cluster regions, F female, FISH fluorescence in situ hybridization, DCDF dual color dual fusion probe, BA *RARA* break apart probe, G gender, HGB hemoglobin, M male, NA not available, NGS next-generation sequencing, OGM optical genome mapping, PCR polymerase chain reaction, PLT platelets, PT patient, RNA-seq RNA sequencing, WBC white blood cells, WGS whole genome sequencing. \* Abnormal signal, a single *PML::RARA* fusion signal in chromosome 17, indicating insertion of the *PML* gene on 15q24 into the *RARA* gene on 17q21. \*\* Abnormal, 267 (53.4%) contained this abnormal *RARA* signal pattern with an extra dim fusion signal, suggesting a possible *RARA* gene rearrangement, and 233 (46.6%) contained a normal *RARA* signal pattern.
